# Supplementary material for: Peptides for Coating TiO2 Implants: An In Silico Approach
Source: MDPI journal article supplement (doi:10.3390/ijms232214048), 2022-11-14
Supplement: s1 [file s1]

**Table S1.** Docking analysis of the integrins involved in the osseointegration process with the proteins containing RGD motif. In this matter, docking analysis showed that fibrinogen is the biological ligand with the greater affinity binding with  $\alpha 5\beta 1$ ,  $\alpha v\beta 3$  and  $\alpha IIb\beta 3$  integrins (-324.1, -334.7 and -271.3, respectively). It is important to note that the VdW+Elec scoring unable to distinguish between favorable and poor protein-ligand interactions. The score represents the potential energy change of the protein and ligand bind. In other words, a very negative score corresponds to a strong binding while a less negative corresponds to a weak binding.

| Integrins (Receptors) | Proteins containing RGD (Ligands) | (VdW+Elec) |
|-----------------------|-----------------------------------|------------|
| $\alpha 5\beta 1$     | Fibronectin                       | -281.3     |
|                       | Vitronectin                       | -227.3     |
|                       | Fibrinogen                        | -324.1     |
| $\alpha v\beta 3$     | Fibronectin                       | -280.9     |
|                       | Vitronectin                       | -230.5     |
|                       | Fibrinogen                        | -334.7     |
| $\alpha IIb\beta 3$   | Fibronectin                       | -231.0     |
|                       | Vitronectin                       | -197.1     |
|                       | Fibrinogen                        | -271.3     |

**Table S2.** Docking analysis of the integrins involved in the osseointegration process with low-cost proteins. Myosin was the protein that presented the best binding results with integrins  $\alpha 5\beta 1$ ,  $\alpha v\beta 3$  and  $\alpha IIb\beta 3$  (-395.1, -397.8 and -429.1, respectively).

| Integrins (Receptors) | Proteins containing RGD (Ligands) | (VdW+Elec) |
|-----------------------|-----------------------------------|------------|
| $\alpha 5\beta 1$     | Bovine Serum Albumin              | -315.5     |
|                       | Ovine Serum Albumin               | -319.6     |
|                       | Myosin                            | -395.1     |
| $\alpha v\beta 3$     | Bovine Serum Albumin              | -351.8     |
|                       | Ovine Serum Albumin               | -336.7     |
|                       | Myosin                            | -397.8     |
| $\alpha IIb\beta 3$   | Bovine Serum Albumin              | -243.0     |
|                       | Ovine Serum Albumin               | -256.8     |
|                       | Myosin                            | -429.1     |

**Table S3.** Modelled motifs and peptides.

| Peptide | ID              | 3DRefiner (score) | Ramachandran |
|---------|-----------------|-------------------|--------------|
| RGD     | V04754526462078 | 181.172           | 100.00%      |
| LKA     | C21705436136961 | 251.872           | 100.00%      |
| PDG     | W01960734338045 | 198.619           | 99.00%       |
| DGL     | X24210131361008 | 145.249           | 100.00%      |
| TGR     | X24773544619083 | 252.258           | 100.00%      |

|                   |                 |         |         |
|-------------------|-----------------|---------|---------|
| QPYLFATDSLIIKRGD  | R05411144699097 | 1045.07 | 92.31%  |
| QPYLFATDSLIIKLKA  | V05783641668081 | 1199.97 | 92.31%  |
| QPYLFATDSLIIKPDG  | L06094350385904 | 1097.43 | 92.31%  |
| QPYLFATDSLIIKDGL  | W21962160466909 | 1224.39 | 84.62%  |
| QPYLFATDSLIIKTGR  | T06467014542103 | 1075.45 | 92.31%  |
| GHTHYHAVRTQTRGD   | A06868278309107 | 1116.52 | 92.31%  |
| GHTHYHAVRTQTTLKA  | J07287096941948 | 1026.62 | 92.31%  |
| GHTHYHAVRTQTTPDG  | V07649126194000 | 1373.60 | 92.31%  |
| GHTHYHAVRTQTDLGL  | Q08008346199989 | 1229.63 | 61.54%  |
| GHTHYHAVRTQTTGR   | K13098217226982 | 1040.59 | 84.62%  |
| RKLDPARGD         | H13344499234915 | 589.390 | 85.71%  |
| RKLDPALKA         | X13528307888985 | 580.441 | 57.14%  |
| RKLDPADPDG        | N14177775423050 | 526.348 | 85.71%  |
| RKLDPADGL         | X14555980346918 | 767.398 | 85.71%  |
| RKLDPATGR         | D14803003139019 | 552.638 | 85.71%  |
| GVL               | F25401392591953 | 230.285 | 100.00% |
| VLP               | I26060282946110 | 218.742 | 100.00% |
| KDD               | X26801342442989 | 102.173 | 100.00% |
| DRG               | E27266373552084 | 157.916 | 100.00% |
| QPYLFATDSLIIKGVLP | P15152441345930 | 1072.04 | 92.31%  |
| QPYLFATDSLIIKVLP  | N15953168220997 | 1061.95 | 76.92%  |
| QPYLFATDSLIIKKDD  | E16599323319912 | 1068.90 | 100.00% |
| QPYLFATDSLIIKDRG  | C17391386338949 | 1126.06 | 84.62%  |
| GHTHYHAVRTQTGVLP  | U17790981741905 | 1140.65 | 84.62   |
| GHTHYHAVRTQTVLP   | F18383252851009 | 1281.99 | 69.23%  |
| GHTHYHAVRTQTKDD   | I20667215733051 | 1309.71 | 69.23%  |
| GHTHYHAVRTQTDRG   | T29047415877104 | 1371.88 | 76.92%  |
| RKLDPAGVL         | W29681113162994 | 629.480 | 71.43%  |
| RKLPAVL           | C23791329088926 | 556.624 | 85.71%  |
| RKLPAKDD          | K30104607878923 | 567.133 | 57.14%  |
| RKLPAADR          | X30655410418034 | 690.092 | 85.71%  |
| DSQ               | X28246158435106 | 160.017 | 100.00% |
| QAG               | V28650720541000 | 160.360 | 100.00% |
| MDS               | G29125438069105 | 427.278 | 100.00% |
| DLN               | R29574049352884 | 202.319 | 100.00% |
| QPYLFATDSLIIKDSQ  | E31178552998066 | 1041.97 | 84.62%  |
| QPYLFATDSLIIKQAG  | K31780036655903 | 1104.53 | 92.31%  |
| QPYLFATDSLIIKMDS  | A32184160361052 | 1042.77 | 100.00% |
| QPYLFATDSLIIKDLN  | W32545390818119 | 1037.89 | 76.92%  |
| GHTHYHAVRTQTDSQ   | I00812461910009 | 937.670 | 84.62%  |
| GHTHYHAVRTQTQAG   | A01141656599998 | 1268.42 | 76.92%  |
| GHTHYHAVRTQTMDS   | R01599465622902 | 1256.76 | 69.23%  |
| GHTHYHAVRTQTDLN   | O25123734586954 | 1100.70 | 83.33%  |
| RKLPAADSQ         | Q02044124416113 | 512.814 | 85.71%  |
| RKLPAQAG          | H02519593763113 | 615.015 | 100.00% |
| RKLPAAMDS         | R03405769977093 | 725.995 | 85.71%  |
| RKLPAADLN         | H04046648834944 | 501.472 | 85.71%  |

**Table S4.** The molecular docking results of the 53 modelled peptides with each integrin. The ten peptides that demonstrated best affinity with the integrins are highlighted.

| Peptide                 | Integrin          |                   |                     |
|-------------------------|-------------------|-------------------|---------------------|
|                         | $\alpha 5\beta 1$ | $\alpha v\beta 3$ | $\alpha IIb\beta 3$ |
| RGD                     | -155,5            | -163,5            | -150,4              |
| LKA                     | -168,6            | -155,9            | -165,3              |
| PDG                     | -104,5            | -105              | -101,9              |
| DGL                     | -91,2             | -92,1             | -92,7               |
| TGR                     | -169,7            | -158,5            | -152,5              |
| QPYLFATDSLIIKRGD        | -147,9            | -168,9            | -147                |
| <b>QPYLFATDSLIIKLKA</b> | <b>-215,4</b>     | <b>-224</b>       | <b>-223,3</b>       |
| QPYLFATDSLIIKPDG        | -173,9            | -145,6            | -136,5              |
| QPYLFATDSLIIKDGL        | -131,2            | -145,6            | -149,4              |
| QPYLFATDSLIIKTGR        | -182              | -178,1            | -186,4              |
| <b>GHTHYHAVRTQTRGD</b>  | <b>-204,2</b>     | -185,5            | <b>-213,5</b>       |
| <b>GHTHYHAVRTQTLKA</b>  | <b>-198,1</b>     | -181,9            | <b>-213,7</b>       |
| GHTHYHAVRTQTPDG         | -189,2            | <b>-208,8</b>     | -179,8              |
| GHTHYHAVRTQTDGL         | -166,2            | -163,9            | -159                |
| <b>GHTHYHAVRTQTTGR</b>  | <b>-238,2</b>     | <b>-219</b>       | <b>-242,6</b>       |
| <b>RKLPDARGD</b>        | <b>-217,4</b>     | <b>-216,3</b>     | <b>-196,6</b>       |
| <b>RKLPDALKA</b>        | <b>-227</b>       | <b>-234,4</b>     | <b>-221,9</b>       |
| RKLPDAPDG               | -130,7            | -142,3            | -127,6              |
| RKLPDADGL               | -133              | -149,1            | -153,6              |
| <b>RKLPDATGR</b>        | <b>-218,1</b>     | <b>-225,9</b>     | <b>-235,6</b>       |
| GVL                     | -79,1             | -81,2             | -75,6               |
| VLP                     | -70,2             | -71,3             | -66,3               |
| KDD                     | -118              | -123,2            | -119,3              |
| DRG                     | -117,6            | -118,6            | -119,3              |
| QPYLFATDSLIIKGVL        | -143,5            | -147,6            | -139,6              |
| QPYLFATDSLIIKVLP        | -128,1            | -148,6            | -141,8              |
| QPYLFATDSLIIKKDD        | -162              | <b>-207,6</b>     | -172,5              |
| QPYLFATDSLIIKDRG        | -144,4            | -169,1            | -142,1              |
| GHTHYHAVRTQTGVL         | -185,7            | <b>-210,8</b>     | <b>-182,6</b>       |
| GHTHYHAVRTQTVLP         | -174,9            | -185,8            | -181,9              |
| GHTHYHAVRTQTKDD         | -145,6            | -156,4            | -147,4              |
| GHTHYHAVRTQTDRG         | -185,5            | -194,7            | -191,2              |
| RKLPDAGVL               | -185,1            | -167,8            | -176,8              |
| <b>RKLPDAVLP</b>        | <b>-195,9</b>     | <b>-205,3</b>     | <b>-183,1</b>       |
| RKLPDAKDD               | -127,8            | -144,2            | -151,9              |
| RKLPDADRG               | -191,3            | -201,9            | -174                |
| DSQ                     | -109,8            | -117,4            | -107,3              |
| QAG                     | -80               | -87,9             | -78,1               |
| MDS                     | -107,2            | -104,2            | -97,5               |
| DLN                     | -102,5            | -112,5            | -97,6               |
| QPYLFATDSLIIKDSQ        | -129,3            | -168,2            | -130,5              |
| QPYLFATDSLIIKQAG        | -136,1            | -140,4            | -124,4              |
| QPYLFATDSLIIKMDS        | -153,2            | -164,9            | -146,1              |
| QPYLFATDSLIIKDLN        | -123,8            | -138              | -137,1              |

|                        |               |               |               |
|------------------------|---------------|---------------|---------------|
| GHTHYHAVRTQTDSQ        | -155,2        | -158,5        | -141,6        |
| <b>GHTHYHAVRTQTQAG</b> | <b>-204,9</b> | -194,6        | <b>-200</b>   |
| GHTHYHAVRTQTMDS        | -163,9        | -164,5        | -150          |
| <b>GHTHYHAVRTQTDLN</b> | <b>-196,4</b> | <b>-213,4</b> | <b>-202,2</b> |
| RKLPDADSQ              | -169,9        | -195,5        | -153,4        |
| RKLPDAQAG              | -177,9        | -167,8        | -158,1        |
| RKLPDAMDS              | -171,9        | -191,9        | -151,9        |
| RKLPDADLN              | -176,9        | -195          | -174,6        |

---

**Table S5.** Assembly of the complex peptides.

| Peptide that binds<br>TiO <sub>2</sub> | Motif<br>recognized<br>by integrin<br>$\alpha 5\beta 1$<br>(Ligand) | Complete amino acid<br>sequence (complex<br>peptide) | Motif<br>recognized<br>by integrin<br>$\alpha v\beta 3$<br>(Ligand) | Complete amino acid<br>sequence (complex<br>peptide) | Motif<br>recognized<br>by integrin<br>$\alpha IIb\beta 3$<br>(Ligand) | Complete amino acid<br>sequence (complex<br>peptide) |
|----------------------------------------|---------------------------------------------------------------------|------------------------------------------------------|---------------------------------------------------------------------|------------------------------------------------------|-----------------------------------------------------------------------|------------------------------------------------------|
| QPYLFATDSLIK                           | RGD<br>(Fibronectin)                                                | QPYLFATDSLIKRGD                                      | RGD<br>(Fibronectin)                                                | QPYLFATDSLIKRGD                                      | RGD<br>(Fibronectin)                                                  | QPYLFATDSLIKRGD                                      |
|                                        | RGD<br>(Vitronectin)                                                | QPYLFATDSLIKRGD                                      | RGD<br>(Vitronectin)                                                | QPYLFATDSLIKRGD                                      | RGD<br>(Vitronectin)                                                  | QPYLFATDSLIKRGD                                      |
|                                        | RGD<br>(Fibrinogen)                                                 | QPYLFATDSLIKRGD                                      | RGD<br>(Fibrinogen)                                                 | QPYLFATDSLIKRGD                                      | RGD<br>(Fibrinogen)                                                   | QPYLFATDSLIKRGD                                      |
|                                        | LKA (Bovine<br>Serum<br>Albumin)                                    | QPYLFATDSLIK LKA                                     | GVL<br>(Bovine<br>Serum<br>Albumin)                                 | QPYLFATDSLIK GVL                                     | DSQ<br>(Bovine<br>Serum<br>Albumin)                                   | QPYLFATDSLIK DSQ                                     |
|                                        | PDG (Ovine<br>Serum<br>Albumin)                                     | QPYLFATDSLIK PDG                                     | VLP (Ovine<br>Serum<br>Albumin)                                     | QPYLFATDSLIK VLP                                     | QAG (Ovine<br>Serum<br>Albumin)                                       | QPYLFATDSLIK QAG                                     |
|                                        | TGR<br>(Myosin)                                                     | QPYLFATDSLIK TGR                                     | DRG<br>(Myosin)                                                     | QPYLFATDSLIK DRG                                     | DLN<br>(Myosin)                                                       | QPYLFATDSLIK DLN                                     |
| GHTHYHAVRTQT                           | RGD<br>(Fibronectin)                                                | GHTHYHAVRTQT RGD                                     | RGD<br>(Fibronectin)                                                | GHTHYHAVRTQT RGD                                     | RGD<br>(Fibronectin)                                                  | GHTHYHAVRTQT RGD                                     |

|        |                                  |                 |                                     |                 |                                     |                 |
|--------|----------------------------------|-----------------|-------------------------------------|-----------------|-------------------------------------|-----------------|
|        | RGD<br>(Vitronectin)             | GHTHYHAVRTQTRGD | RGD<br>(Vitronectin)                | GHTHYHAVRTQTRGD | RGD<br>(Vitronectin)                | GHTHYHAVRTQTRGD |
|        | RGD<br>(Fibrinogen)              | GHTHYHAVRTQTRGD | RGD<br>(Fibrinogen)                 | GHTHYHAVRTQTRGD | RGD<br>(Fibrinogen)                 | GHTHYHAVRTQTRGD |
|        | LKA (Bovine<br>Serum<br>Albumin) | GHTHYHAVRTQTLKA | GVL<br>(Bovine<br>Serum<br>Albumin) | GHTHYHAVRTQTGVL | DSQ<br>(Bovine<br>Serum<br>Albumin) | GHTHYHAVRTQTDSQ |
|        | PDG (Ovine<br>Serum<br>Albumin)  | GHTHYHAVRTQTPDG | VLP (Ovine<br>Serum<br>Albumin)     | GHTHYHAVRTQTVLP | QAG (Ovine<br>Serum<br>Albumin)     | GHTHYHAVRTQTQAG |
|        | TGR<br>(Myosin)                  | GHTHYHAVRTQTTGR | DRG<br>(Myosin)                     | GHTHYHAVRTQTDRG | DLN<br>(Myosin)                     | GHTHYHAVRTQTDLN |
| RKLPDA | RGD<br>(Fibronectin)             | RKLPDARGD       | RGD<br>(Fibronectin)                | RKLPDARGD       | RGD<br>(Fibronectin)                | RKLPDARGD       |
|        | RGD<br>(Vitronectin)             | RKLPDARGD       | RGD<br>(Vitronectin)                | RKLPDARGD       | RGD<br>(Vitronectin)                | RKLPDARGD       |
|        | RGD<br>(Fibrinogen)              | RKLPDARGD       | RGD<br>(Fibrinogen)                 | RKLPDARGD       | RGD<br>(Fibrinogen)                 | RKLPDARGD       |
|        | LKA (Bovine<br>Serum<br>Albumin) | RKLPDALKA       | GVL<br>(Bovine<br>Serum<br>Albumin) | RKLPDAGVL       | DSQ<br>(Bovine<br>Serum<br>Albumin) | RKLPDADSQ       |

PDG (Ovine  
Serum  
Albumin)

RKLPDAPDG

VLP (Ovine  
Serum  
Albumin)

RKLPDAVLP

QAG (Ovine  
Serum  
Albumin)

RKLPDAQAG

TGR  
(Myosin)

RKLPDATGR

DRG  
(Myosin)

RKLPDADRG

DLN  
(Myosin)

RKLPDADLN

---

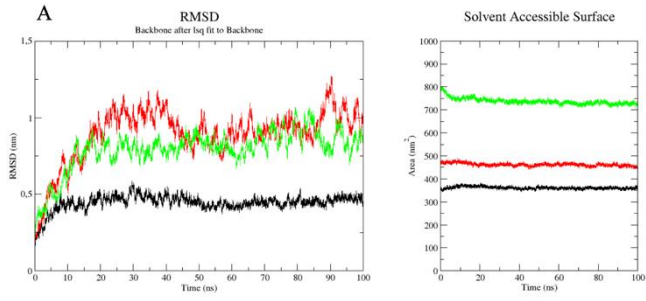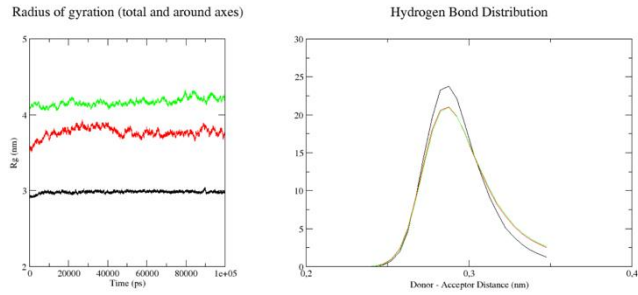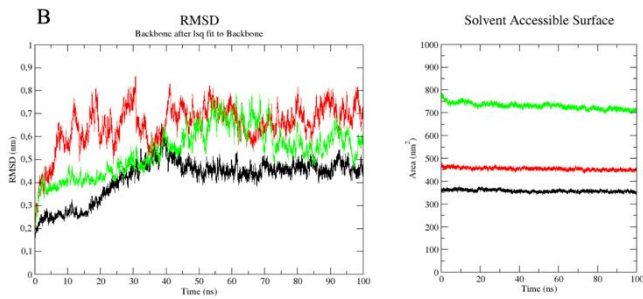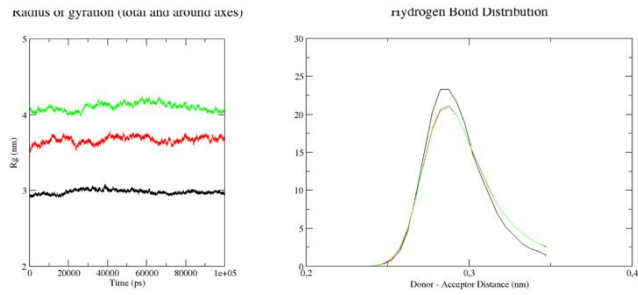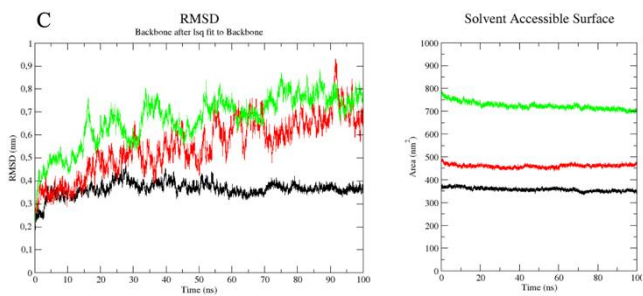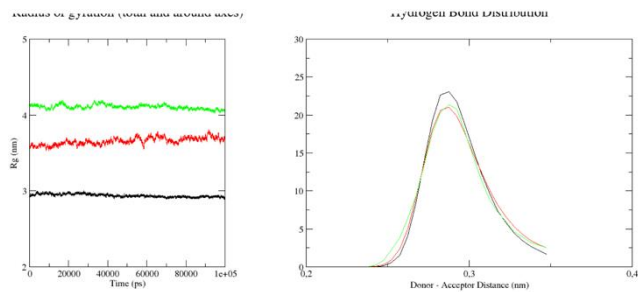



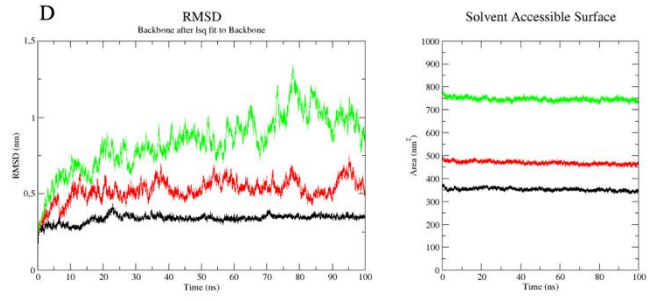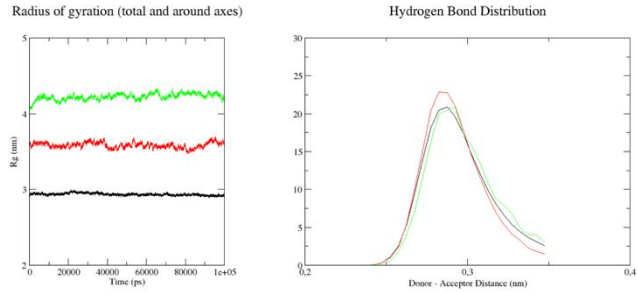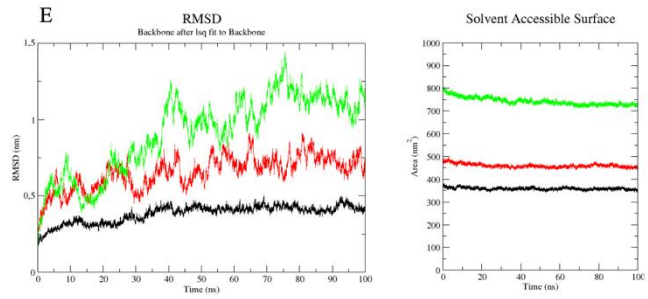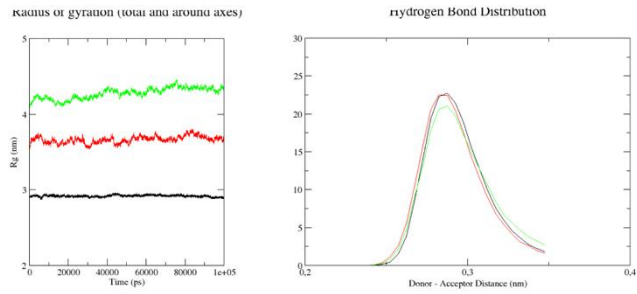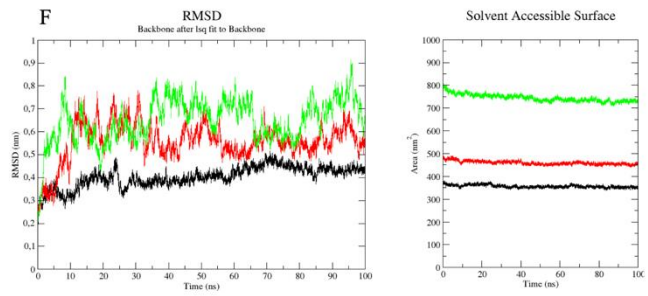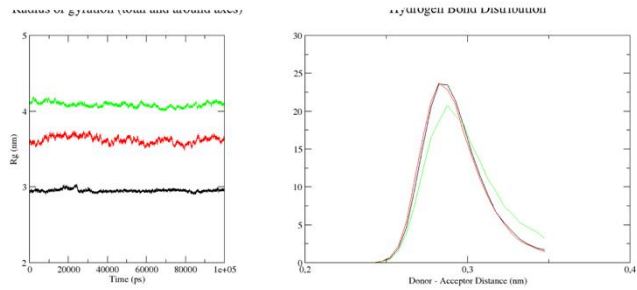

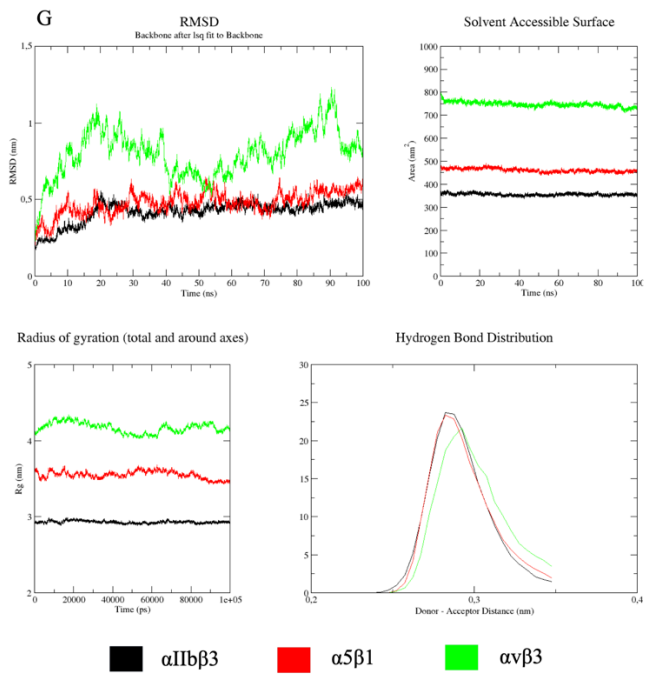

**Figure S1.** RMSD, SASA, Rg and H bonds values for Pep2 (A), Pep4 (B), Pep5 (C), Pep6 (D), Pep7 (E), Pep9 (F), and Pep10 (G).
